# Supplementary material for: Chromosomal‐level assembly of Bactericera cockerelli reveals rampant gene family expansions impacting genome structure, function and insect‐microbe‐plant‐interactions
Source: PubMed Central journal article supplement — Mol Ecol Resour. 2022 Aug 16;23(1):233–52. doi: 10.1111/1755-0998.13693 (PMC10087415; doi:10.1111/1755-0998.13693), 2022-08-16

## Supplemental Figures

**Supplemental Figure 1.** *Bactericera cockerelli*'s putative chromosome regions identified by the TAD analysis pipeline.

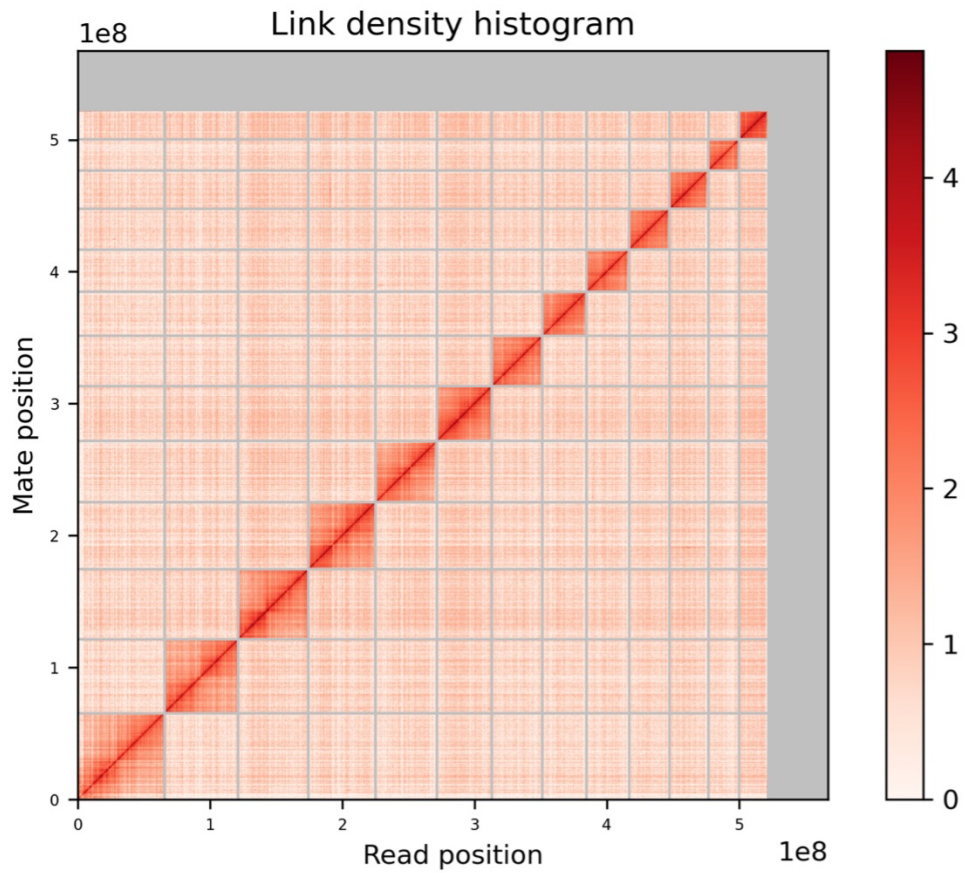

**Supplemental Figure 2.** Cumulative frequency graph of AED scores calculated for each annotated gene of *Bactericera cockerelli* (22,280 genes). The AED score ranges from 0 to 1 and a lower score represents more evidence support for the gene.

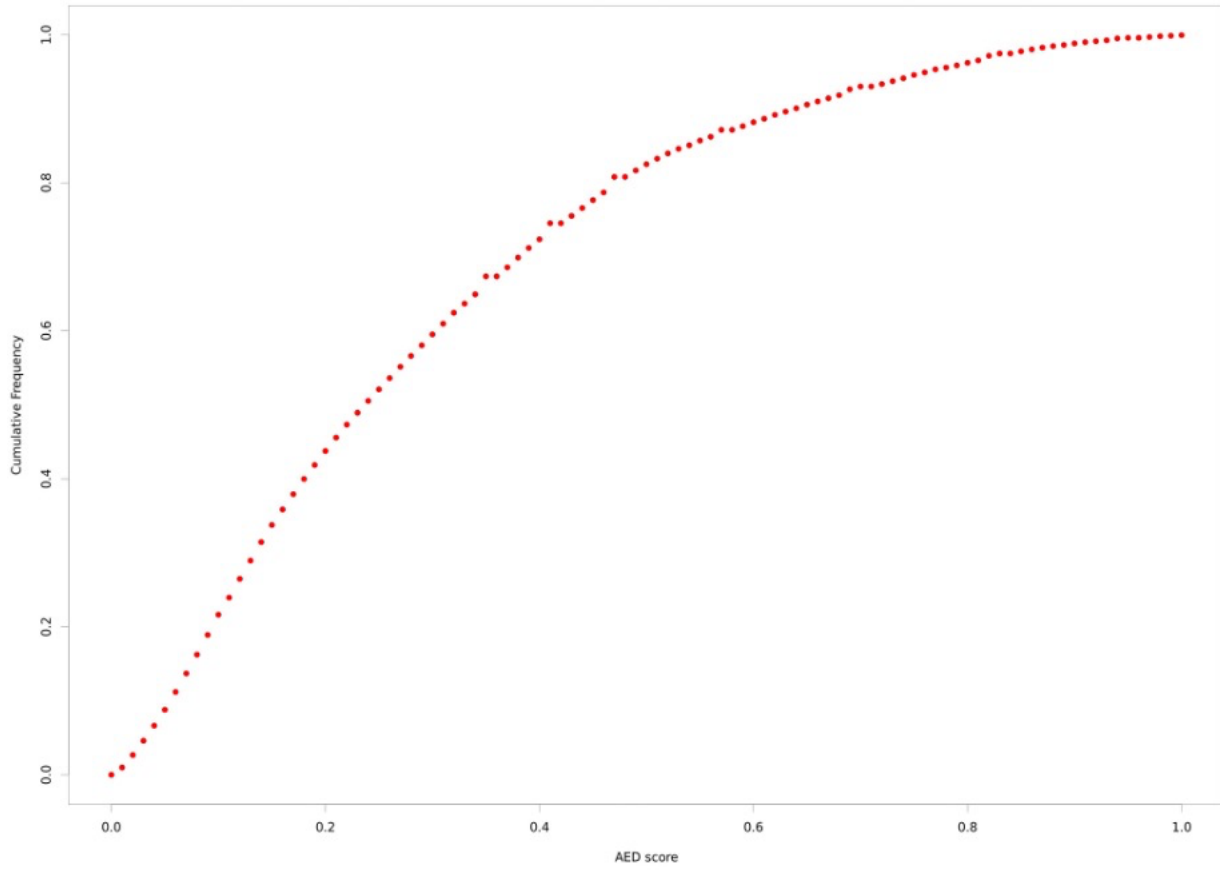

**Supplemental Figure 3. Recently expanded repeat family genes are distributed across euchromatic (A) and heterochromatic (B) compartments.** Mosaic plot represents chromosomal compartment locations of expanded Type I and Type II repeat family proteins ( $n=2,214$ ) and compared to the predicted proportion of A and B compartments within the corresponding chromosome (dashed black lines). Asterisk indicates the single chromosome (Scaffold\_1) showing a significant bias with more repeated detected in the heterochromatic compartment than expected by chance (Proportion test, d.f. = 1,  $P = 0.001376$ ).

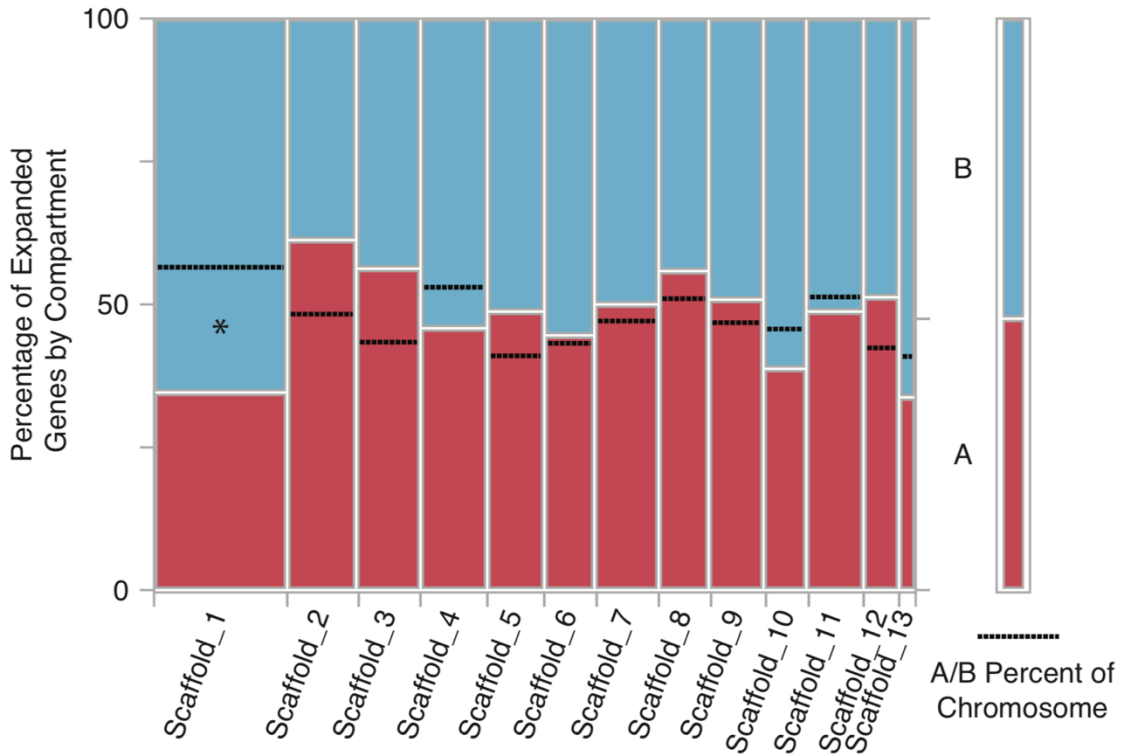

**Supplemental Figure 4.** Phylogenetic analysis of ASL genes in *P. venusta*, *D. citri*, and *B. cockerelli* using the same representative taxa from Sloan et al. (2014). Bootstrap values are only indicated for nodes with >50 % support.

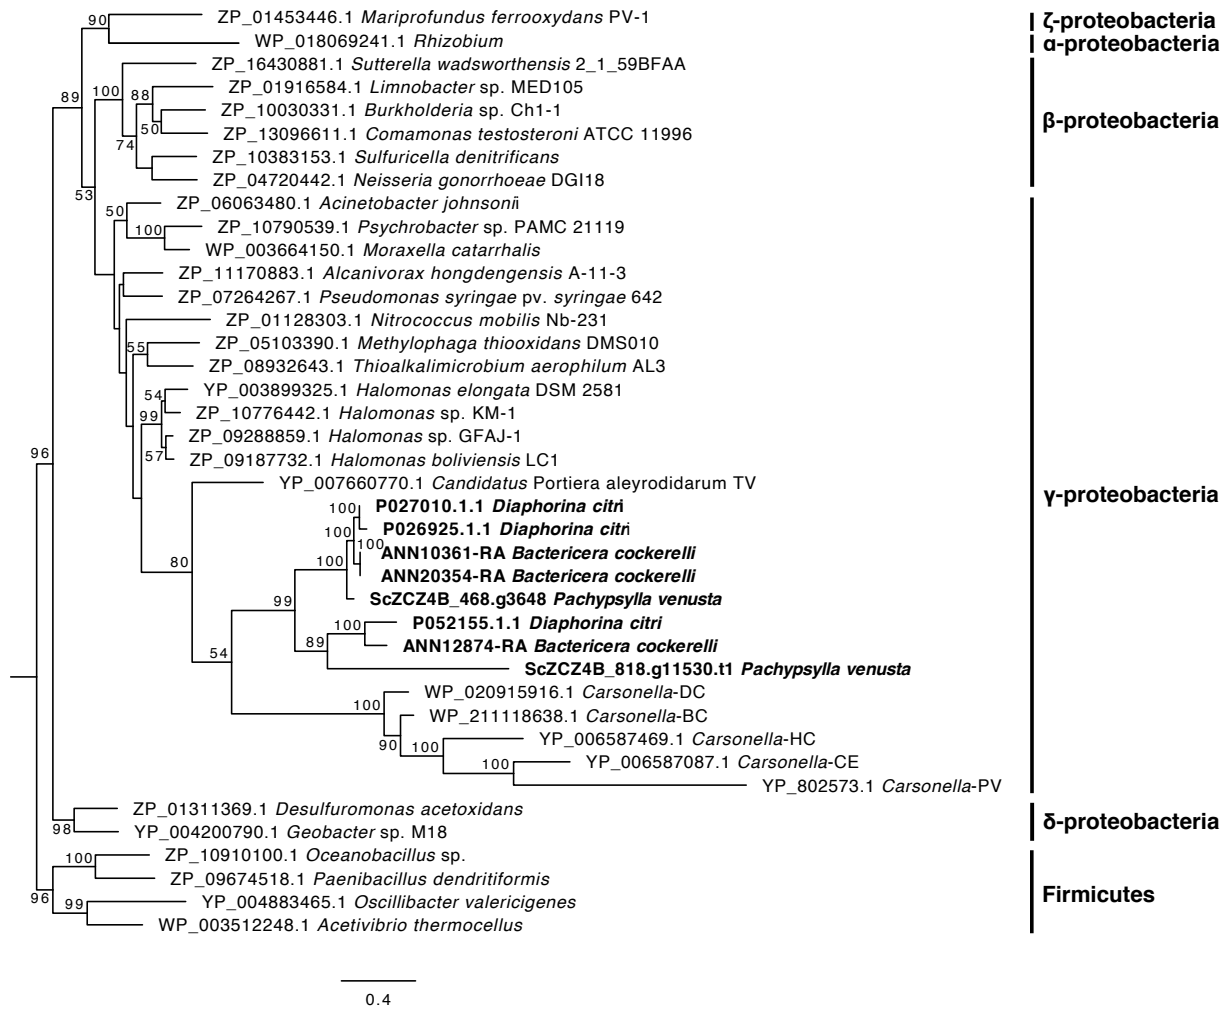

**Supplemental Figure 5.** Phylogenetic analysis of ASL genes in *P. venusta*, *D. citri*, and *B. cockerelli* using different representative taxa from Supplemental Figure 4. Bootstrap values are only indicated for nodes with >50 % support.

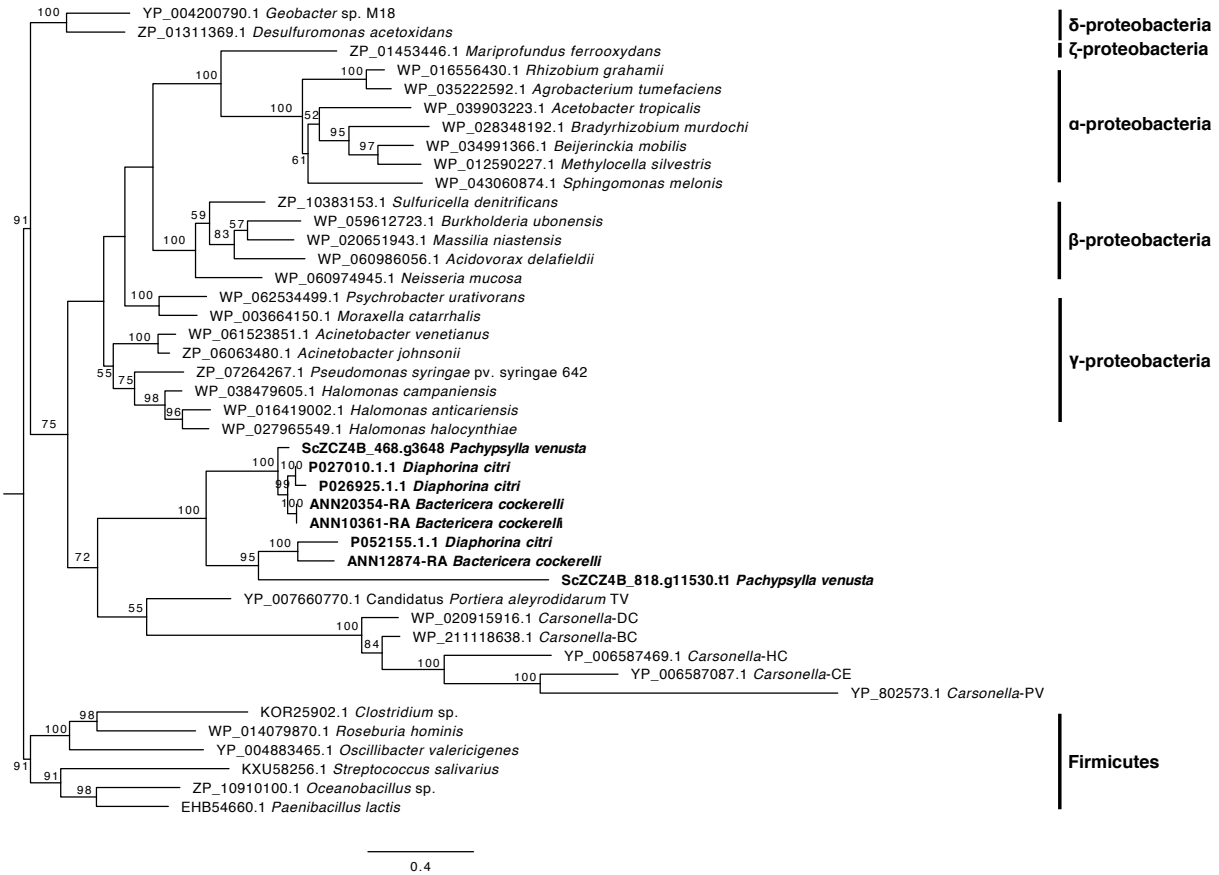

**Supplemental Figure 6.** Phylogenetic analysis of CM genes in *P. venusta*, *D. citri*, and *B. cockerelli*. Bootstrap values are only indicated for nodes with >50 % support.

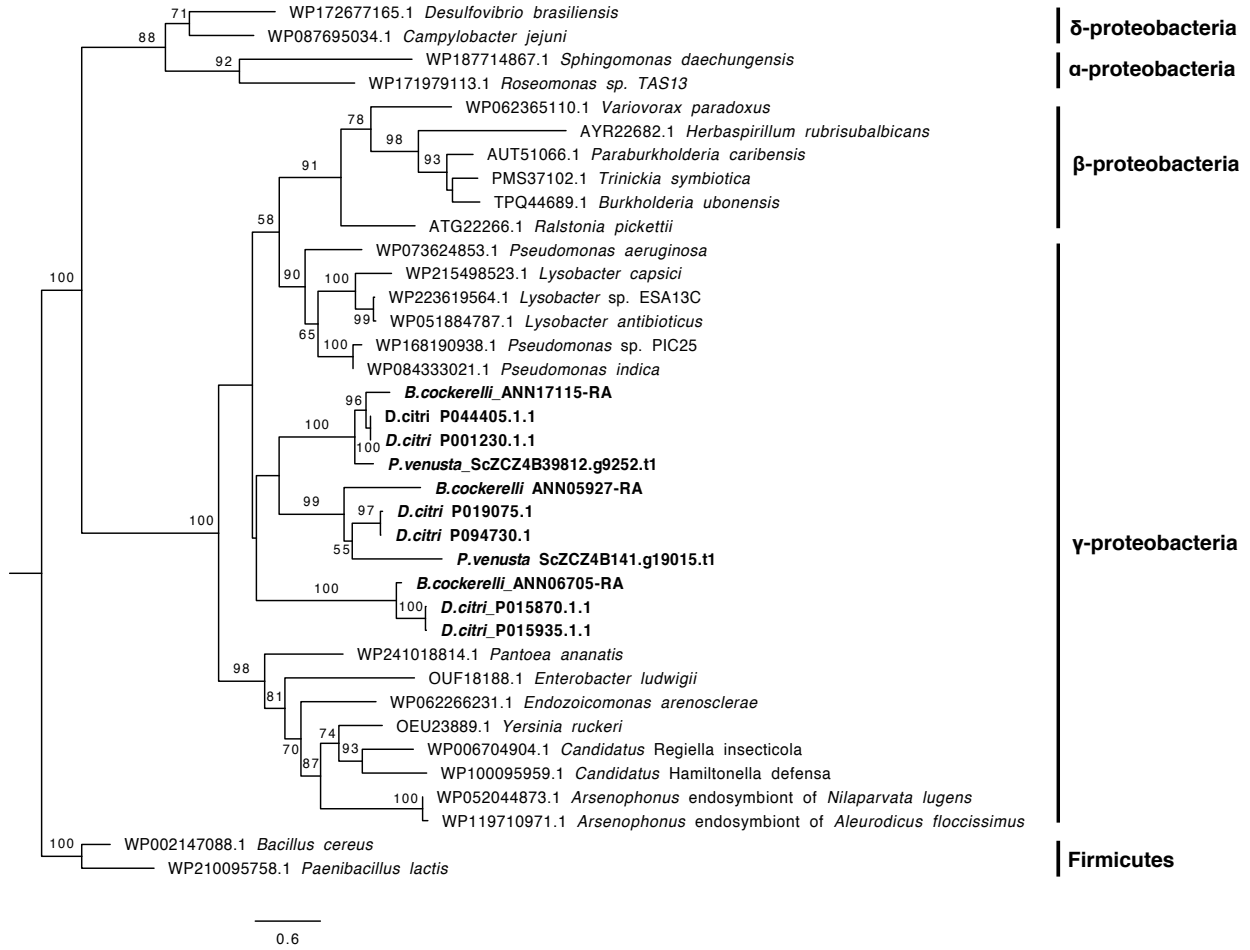

Supplement: MEN-23-233-s001.pdf [file MEN-23-233-s001.pdf]
